# Supplementary material for: Temperature regulation growth of Au nanocrystals: from concave trisoctahedron to dendritic structures and their ultrasensitive SERS-based detection of lindane
Source: Royal Society of Chemistry journal article supplement (doi:10.1039/c7tc03808a), 2017-01-01
Supplement: c7tc03808a1.pdf [file c7tc03808a1.pdf]

### Supporting Information

#### Temperature Regulation Growth of Au Nanocrystals: from Concave Trisoctahedron to Dendritic Structures and Their Ultrasensitive SERS-based Detection of Lindane

Xia Zhou<sup>a,b,c</sup>, Qian Zhao<sup>a,b</sup>, Guangqiang Liu<sup>a\*</sup>, Hongwen Zhang<sup>a</sup>, Yue Li<sup>a</sup>, and Weiping Cai<sup>a,b\*</sup>

<sup>a</sup>Key Lab of Materials Physics, Anhui Key Lab of Nanomaterials and Nanotechnology, Institute of Solid State Physics, Chinese Academy of Sciences, Hefei 230031, PR China

<sup>b</sup>University of Science and Technology of China, Hefei 230026, PR China

<sup>c</sup>Anhui Key Laboratory of Spin Electron and Nanomaterials, School of Chemistry and Chemical Engineering, Suzhou University, Suzhou, Anhui 234000, PR China

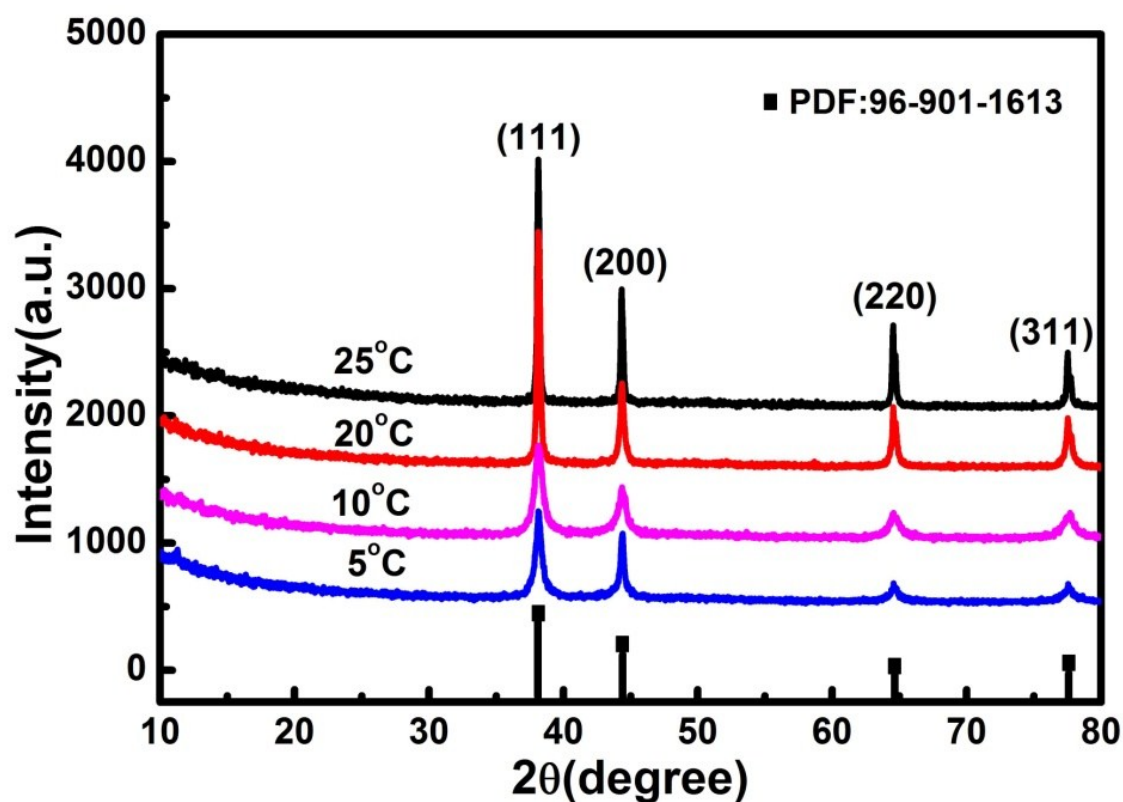

**Figure S1.** The XRD patterns of the products obtained by addition of Au seed solution with 0.05mL at different reaction temperatures.

\* To whom all correspondence should be addressed

E-mail: [liugq@issp.ac.cn](mailto:liugq@issp.ac.cn), [wpcai@issp.ac.cn](mailto:wpcai@issp.ac.cn); Tel: +86-551-65592747; Fax: +86-551-65591434

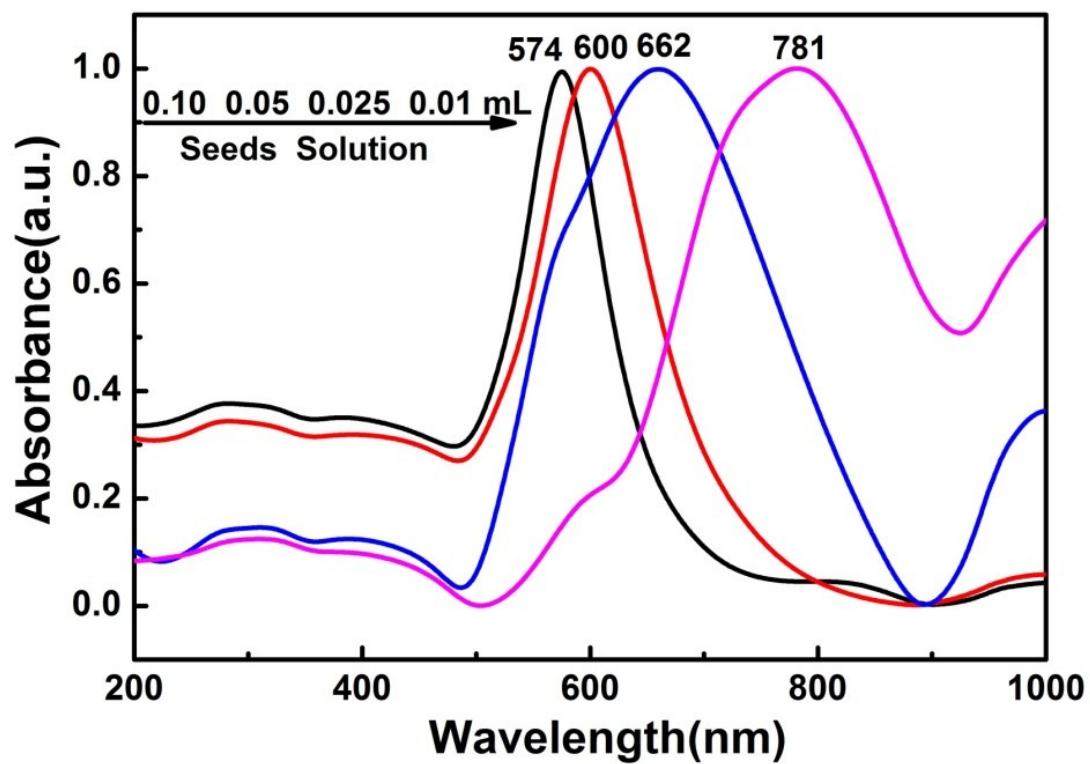

**Figure S2.** Optical absorbance spectra of Au colloidal solutions obtained by addition of different Au seeds solution amounts (0.10 mL, 0.05 mL, 0.025 mL, 0.01 mL) at 25°C, respectively.

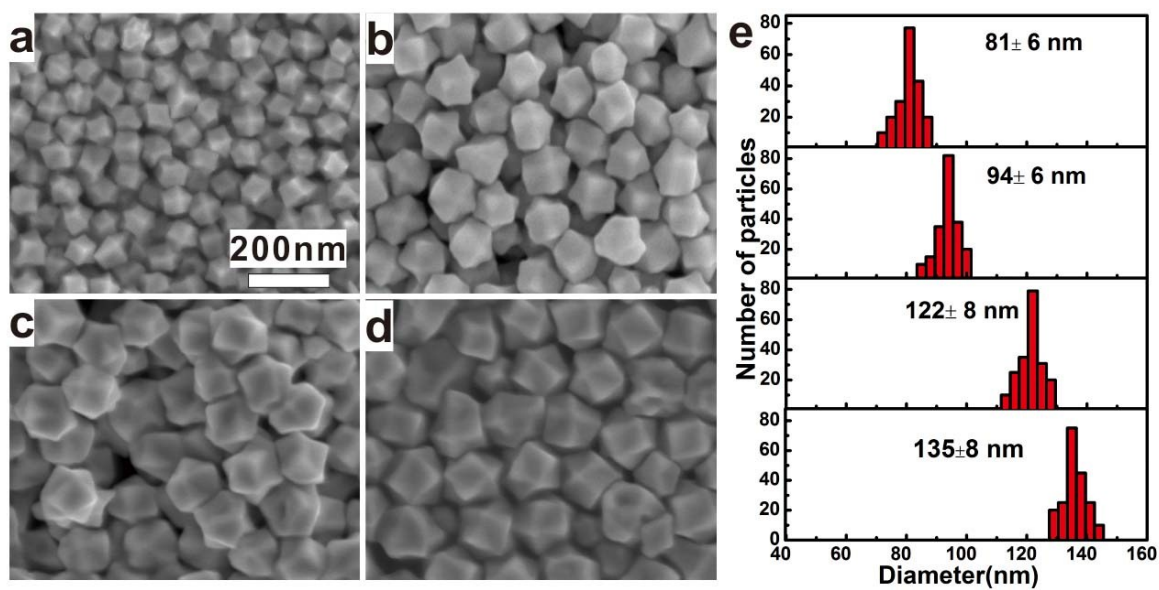

**Figure S3.** (a–d): SEM images of products obtained by addition of Au seeds solution amounts 0.10 mL, 0.05mL, 0.025mL and 0.01 mL, respectively, at 25°C. (e): The size distribution histograms of the particles. The frames from top to bottom: correspond to the samples in panels a–d, respectively.

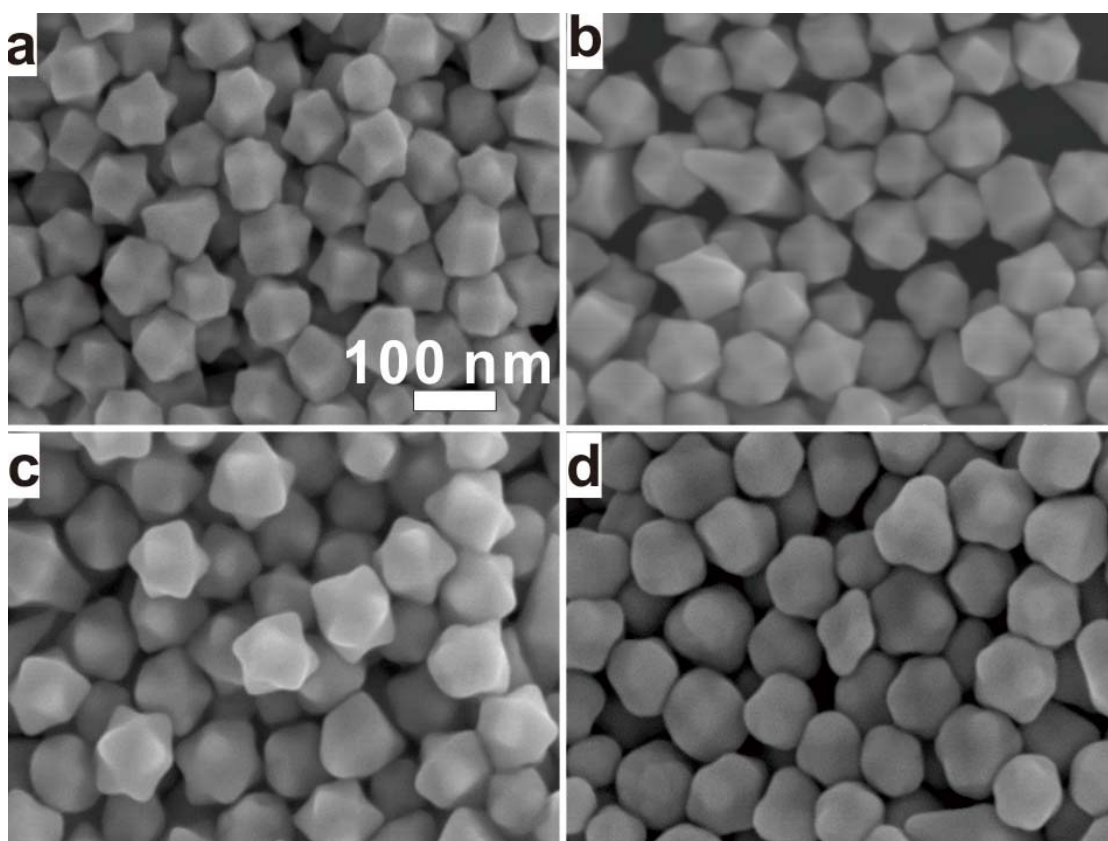

**Figure S4.** The SEM images of the products obtained by addition of Au seeds solution with 0.05mL at different reaction temperatures. (a): 40 °C, (b): 60 °C, (c): 80 °C, (d):100 °C.

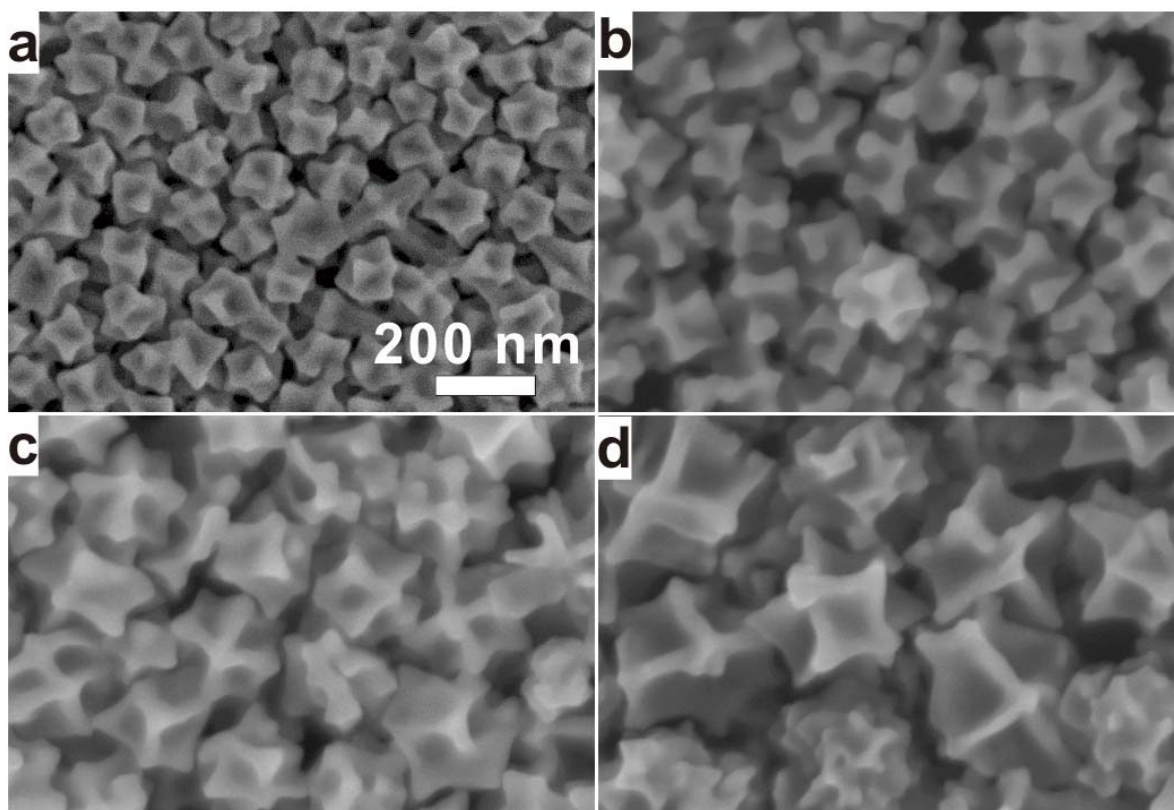

**Figure S5.** The SEM images of the Au nanocrystals obtained at 20°C by addition of Au seeds solution amounts (a): 0.10 mL, (b): 0.05mL, (c): 0.025mL and (d): 0.01 mL.

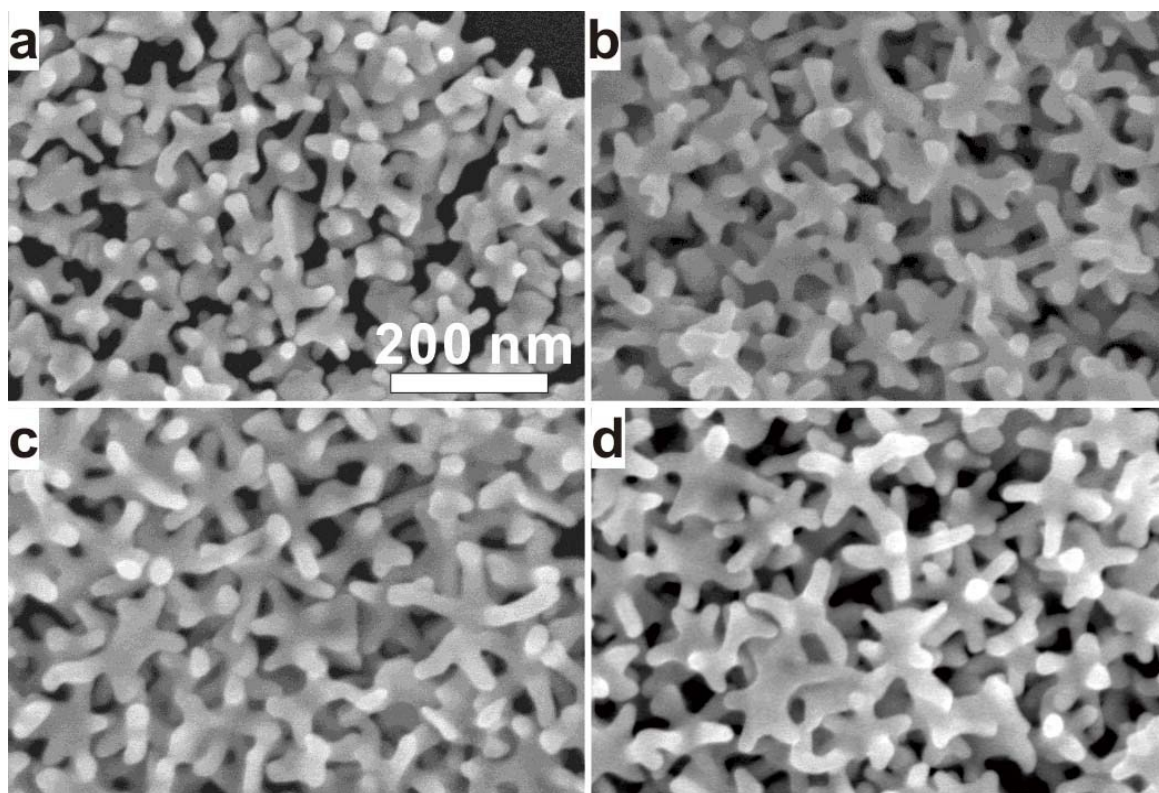

**Figure S6.** The SEM images of the Au nanocrystals obtained at 10°C by addition of Au seeds solution amounts (a): 0.10 mL, (b): 0.05mL, (c): 0.025mL and (d): 0.01 mL.



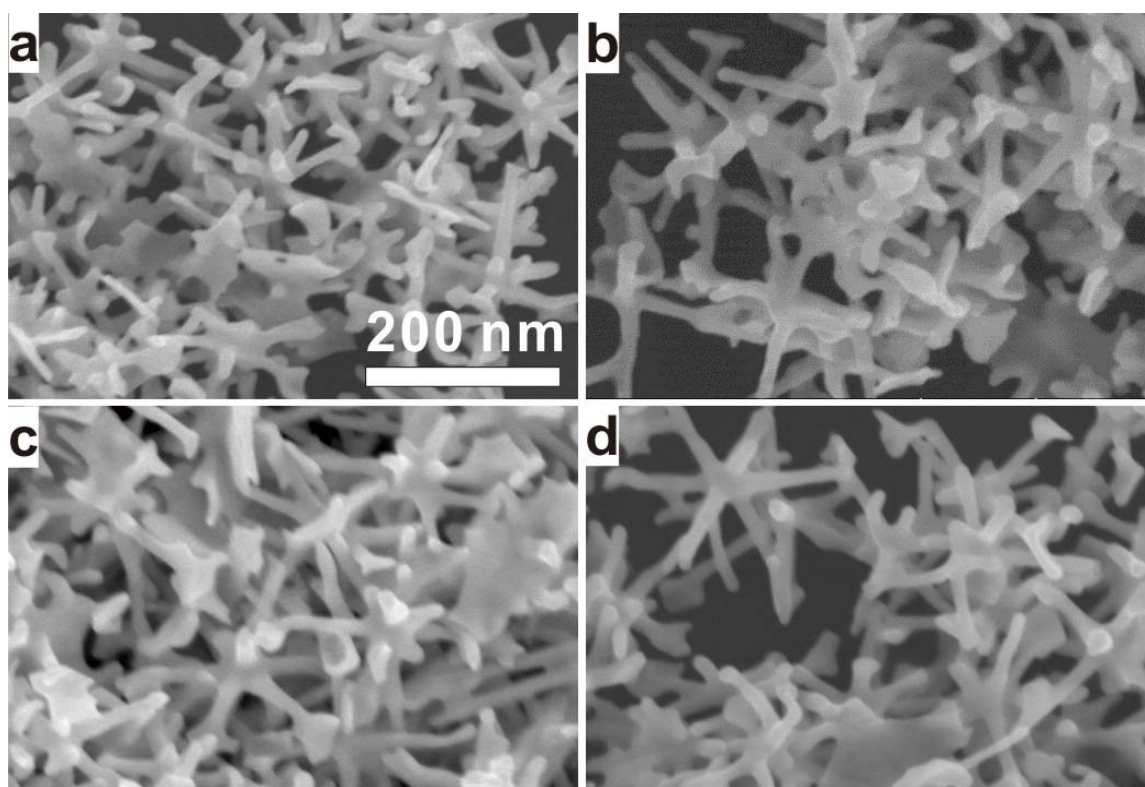

**Figure S7.** The SEM images of the Au nanocrystals obtained at 5°C by addition of Au seeds solution amounts (a): 0.10 mL, (b): 0.05mL, (c): 0.025mL and (d): 0.01 mL.

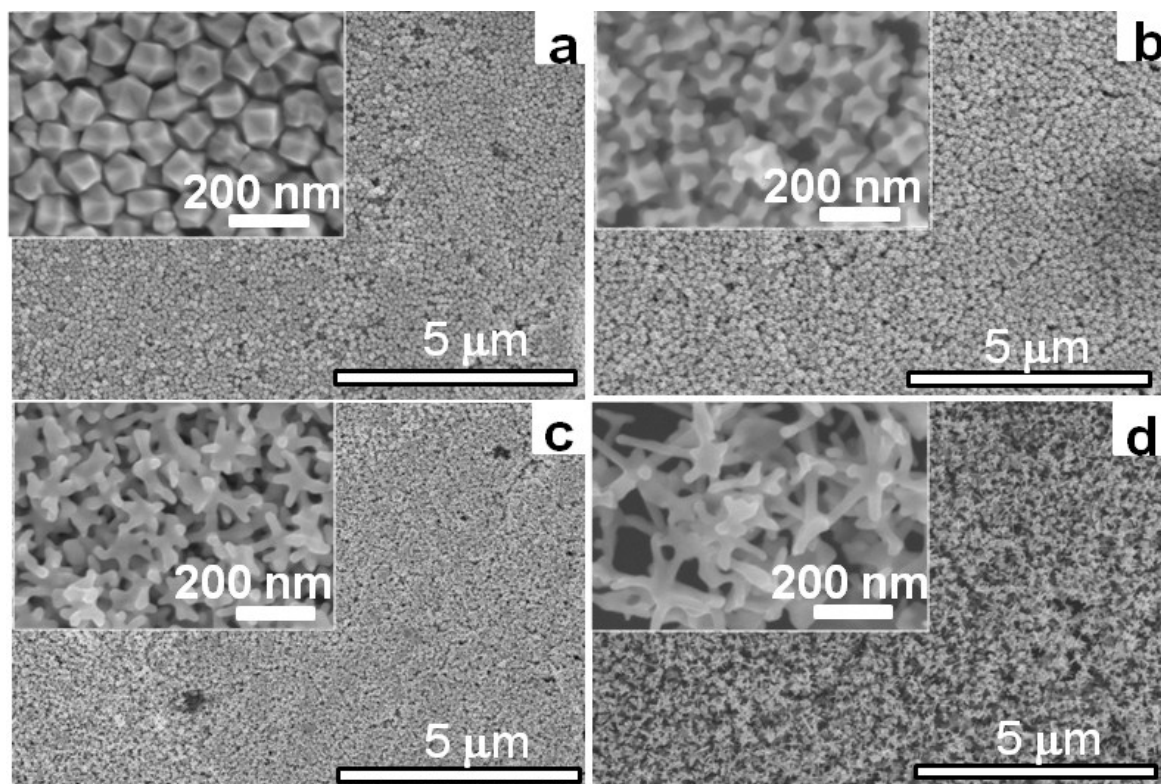

**Figure S8.** SEM images of the films built of the Au nanocrystals obtained by addition of 0.05 mL seeds solution at different reaction temperatures. (a): 25°C, (b): 20°C, (c): 10°C, (d): 5°C.



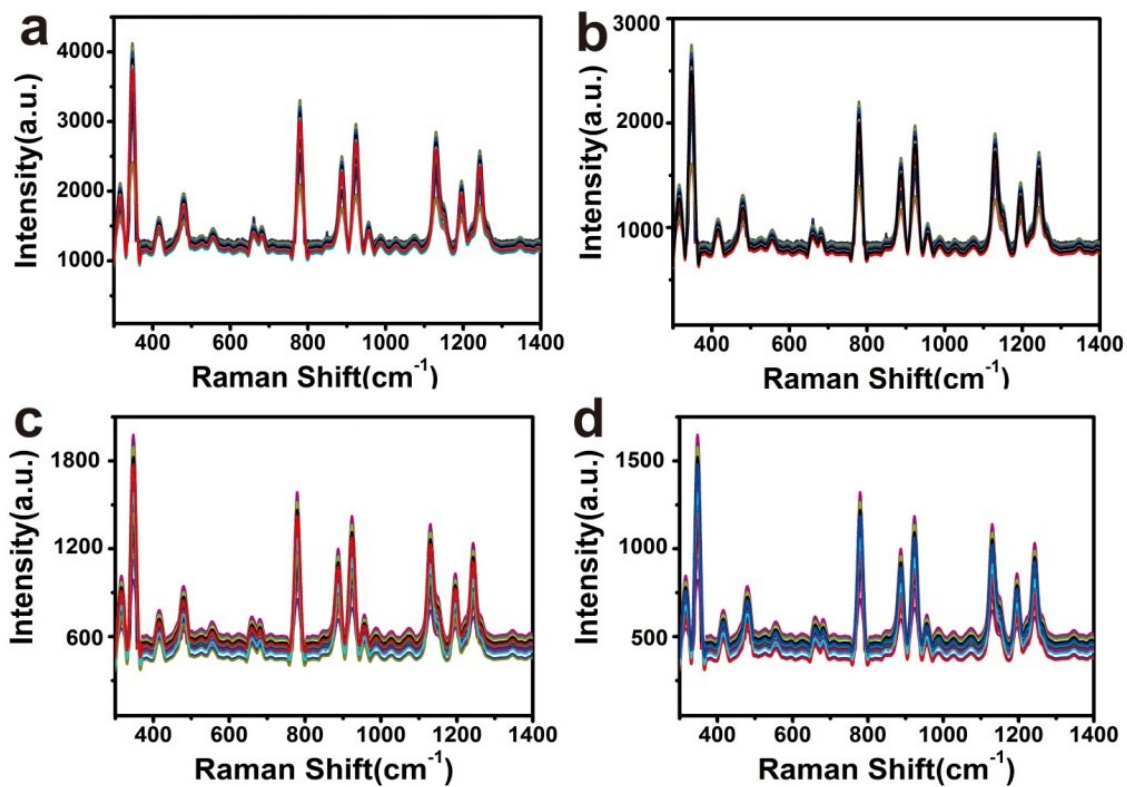

**Figure S9.** The Raman spectra from the 20 random spots on the films built of the nanocrystals obtained at (a) 25°C, (b) 20 °C, (c) 10 °C, (d) 5 °C, after soaking in the solution with  $10^{-6}$  M in lindane concentration. (excited at 785nm)

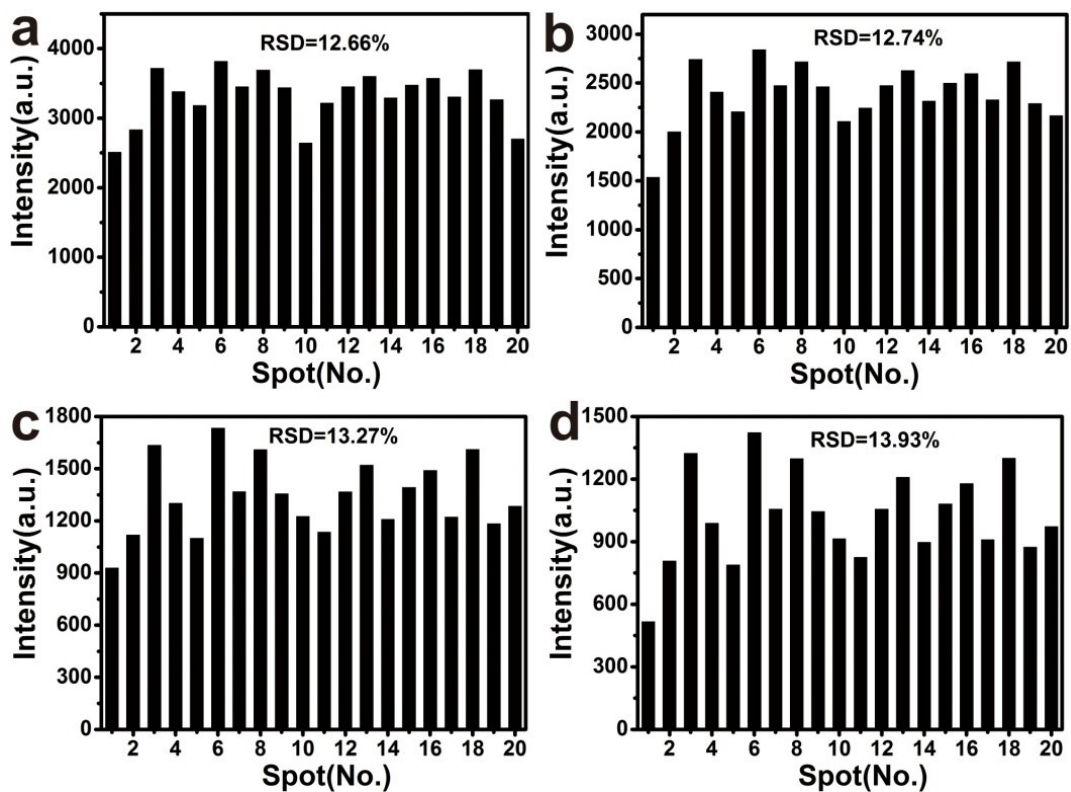

**Figure S10.** The intensity of the main peak at 345 cm<sup>-1</sup> from each spots on the Au nanocrystals-built films. The data in (a-d) are from (a), (b), (c) and (d) in Figure S10, respectively.

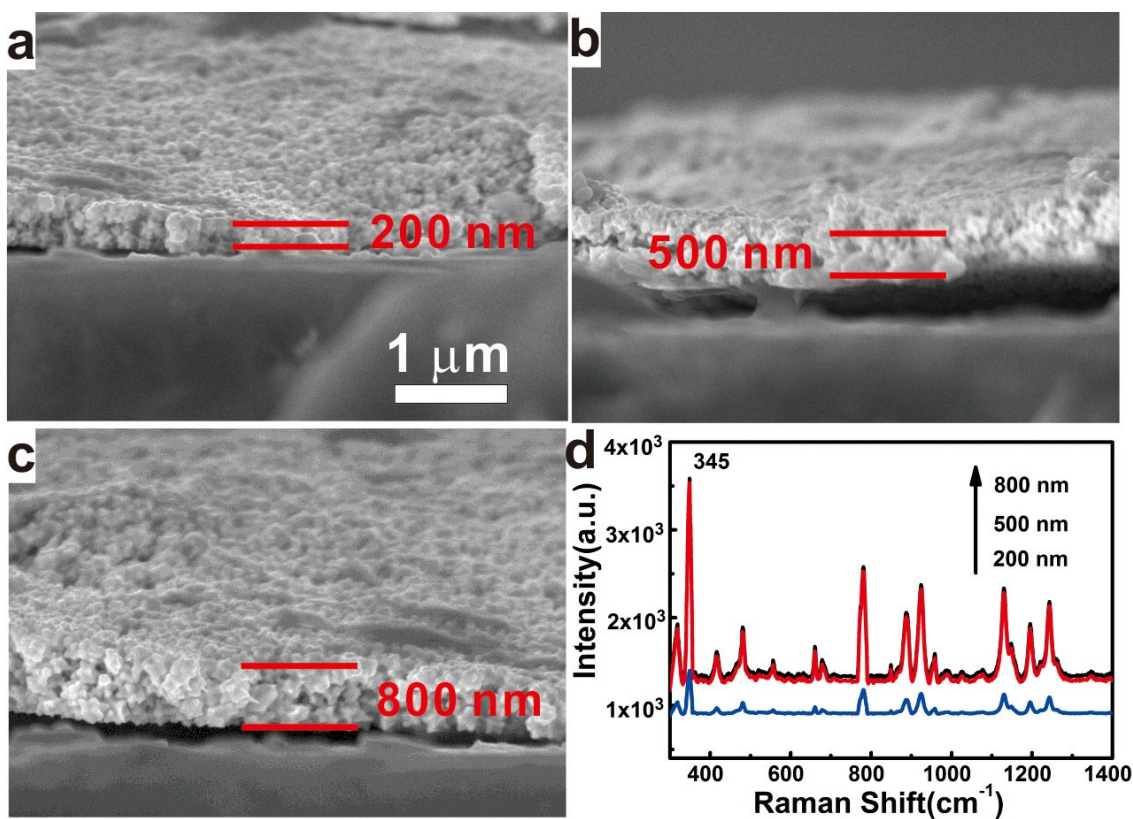

**Figure S11.** The SEM images of the Au concave trisoctahedral nanocrystals-built films with (a) 200 nm, (b) 500 nm and (c) 800 nm in thickness. (d): The Raman spectra of the lindane molecules on these films after soaking in the solution with  $10^{-6}$ M in lindane concentration and drying.(excited at 785 nm).

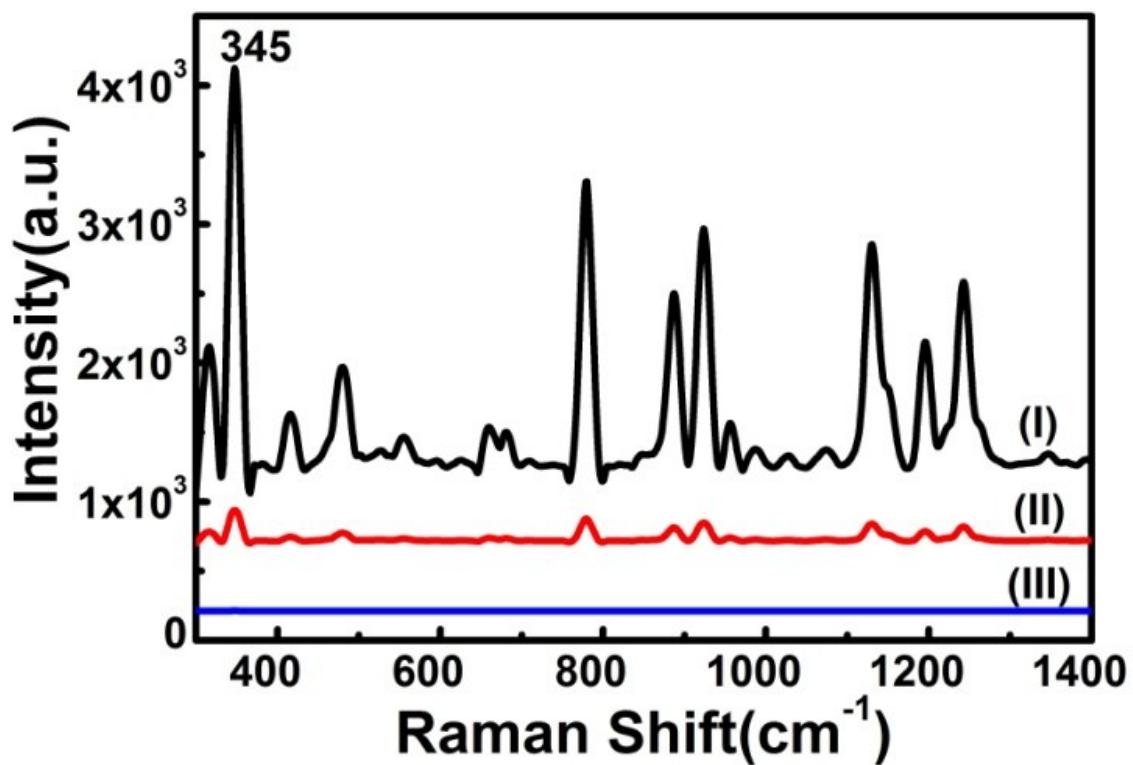

**Figure S12.** The Raman spectra of the lindane molecules on the Au concave trisoctahedral nanocrystals-built film after soaking in the lindane solution with  $10^{-6}$ M, excited at different wavelengths. Curve (I): 785 nm; Curve (II): 633 nm; Curve (III): 532 nm.

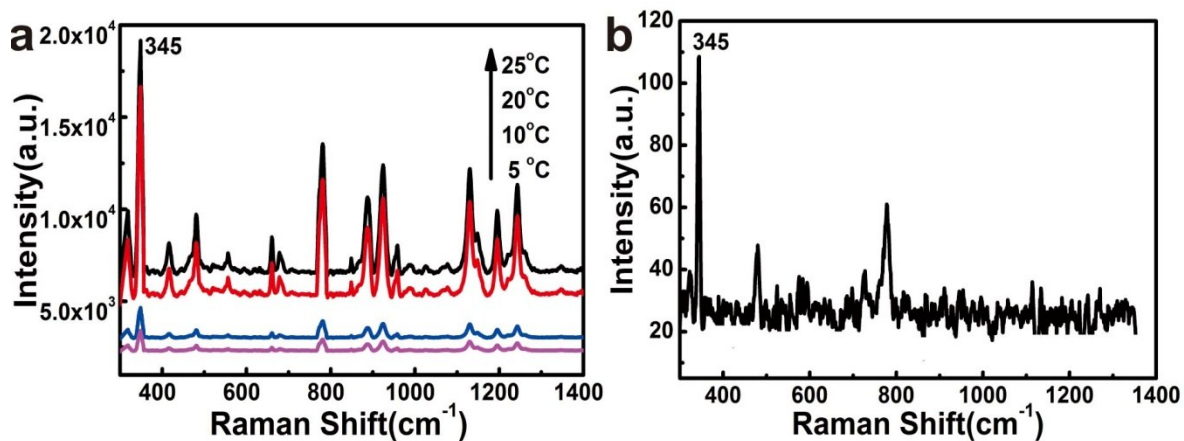

**Figure S13.** Raman spectra of the lindane molecules by dropping (a): 20 $\mu$ L lindane solution ( $10^{-5}$  M) on the films built of the Au nanocrystals obtained at different reaction temperatures and (b): 50 $\mu$ L lindane solution (0.1M) on Si wafer, and drying.
